# Supplementary material for: High-fat diet impairs ferroptosis and promotes cancer invasiveness via downregulating tumor suppressor ACSL4 in lung adenocarcinoma
Source: PubMed Central journal article supplement (PMC8166005; doi:10.1186/s13062-021-00294-7), 2021-05-31

Figure S5

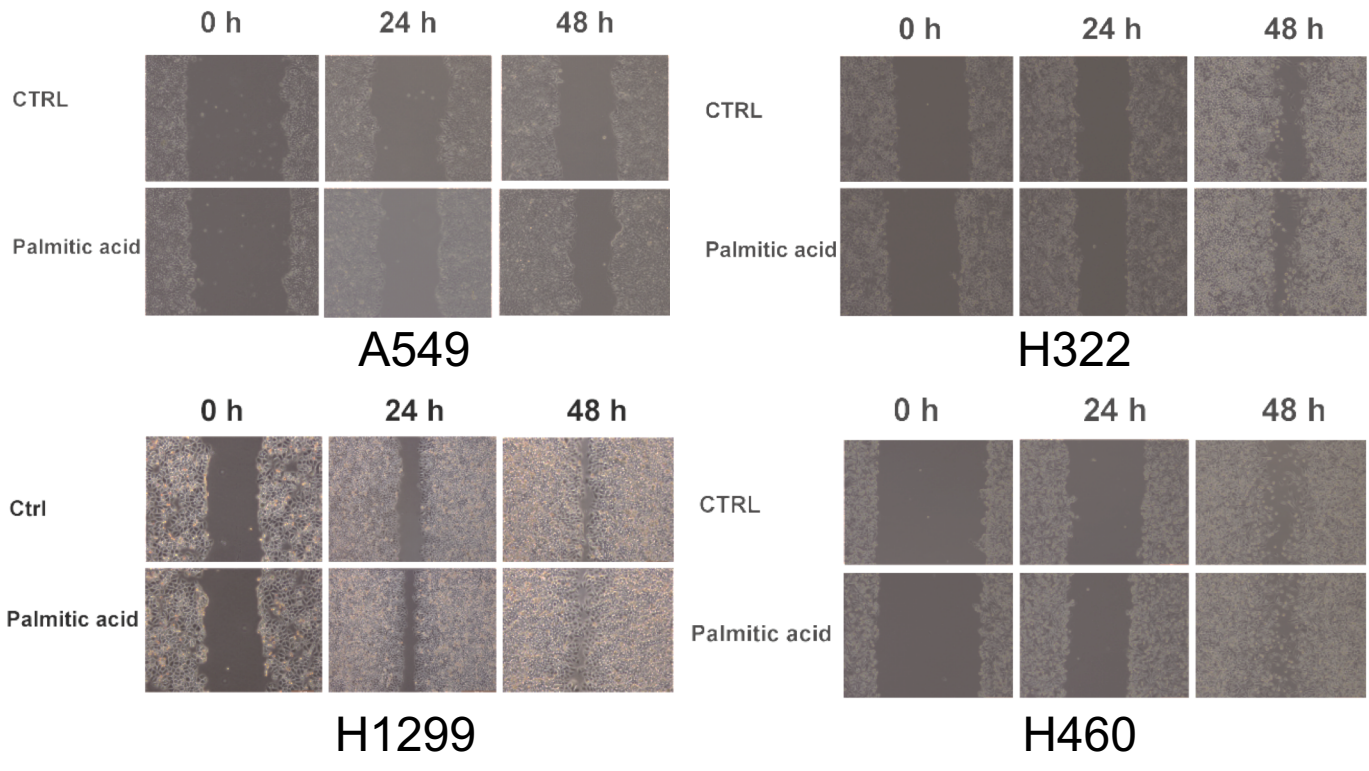

Supplement: 13062_2021_294_MOESM5_ESM.pdf [file 13062_2021_294_MOESM5_ESM.pdf]
